# Supplementary material
Source: MDPI journal article supplement (https://www.mdpi.com/2072-4292/12/1/154)
Supplement: s1 [file s1]

Supplementary Materials

# Inundation Exposure Assessment for Majuro Atoll, Republic of the Marshall Islands Using a High-Accuracy Digital Elevation Model

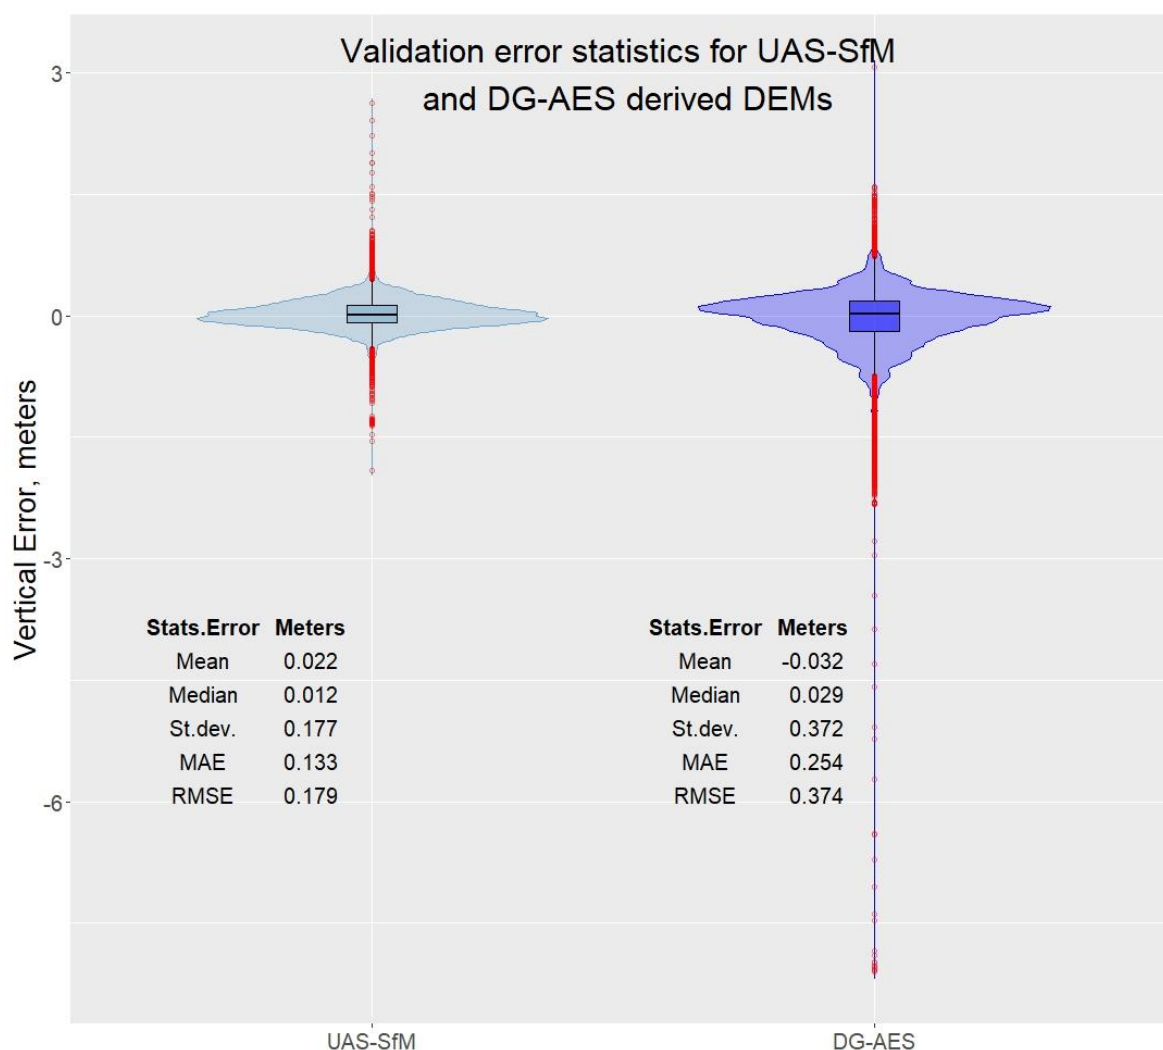

**Figure S1.** Accuracy information for the UAS-SfM and DG-AES DEMs presented as violin plots. A violin plot is a type of box plot that shows the full distribution of the data in addition to summary statistics and interquartile range. MAE is mean absolute error. RMSE is root mean square error.

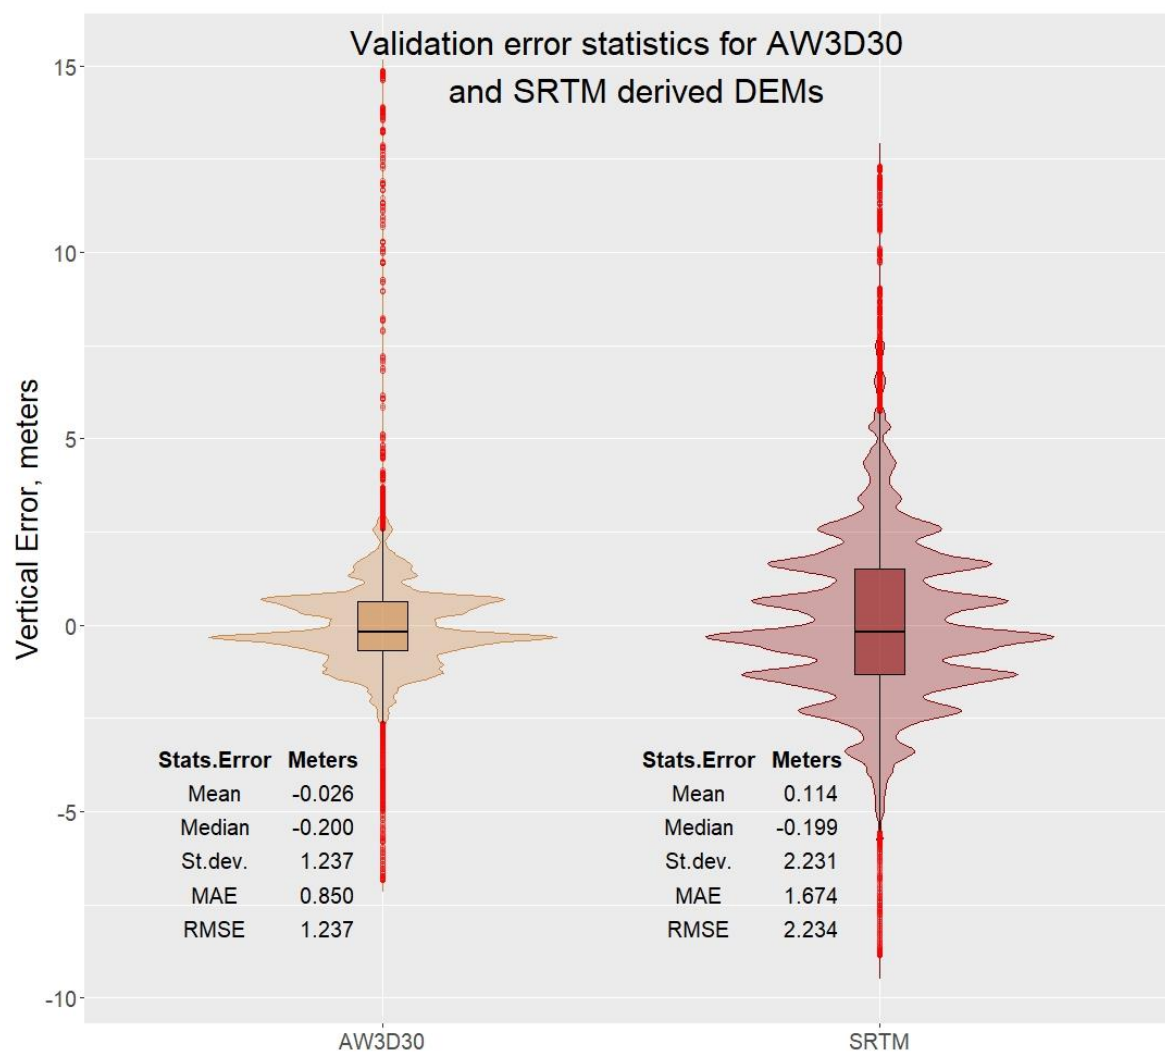

**Figure S2.** Accuracy information for the AW3D30 and SRTM DEMs presented as violin plots. A violin plot is a type of box plot that shows the full distribution of the data in addition to summary statistics and interquartile range. MAE is mean absolute error. RMSE is root mean square error.

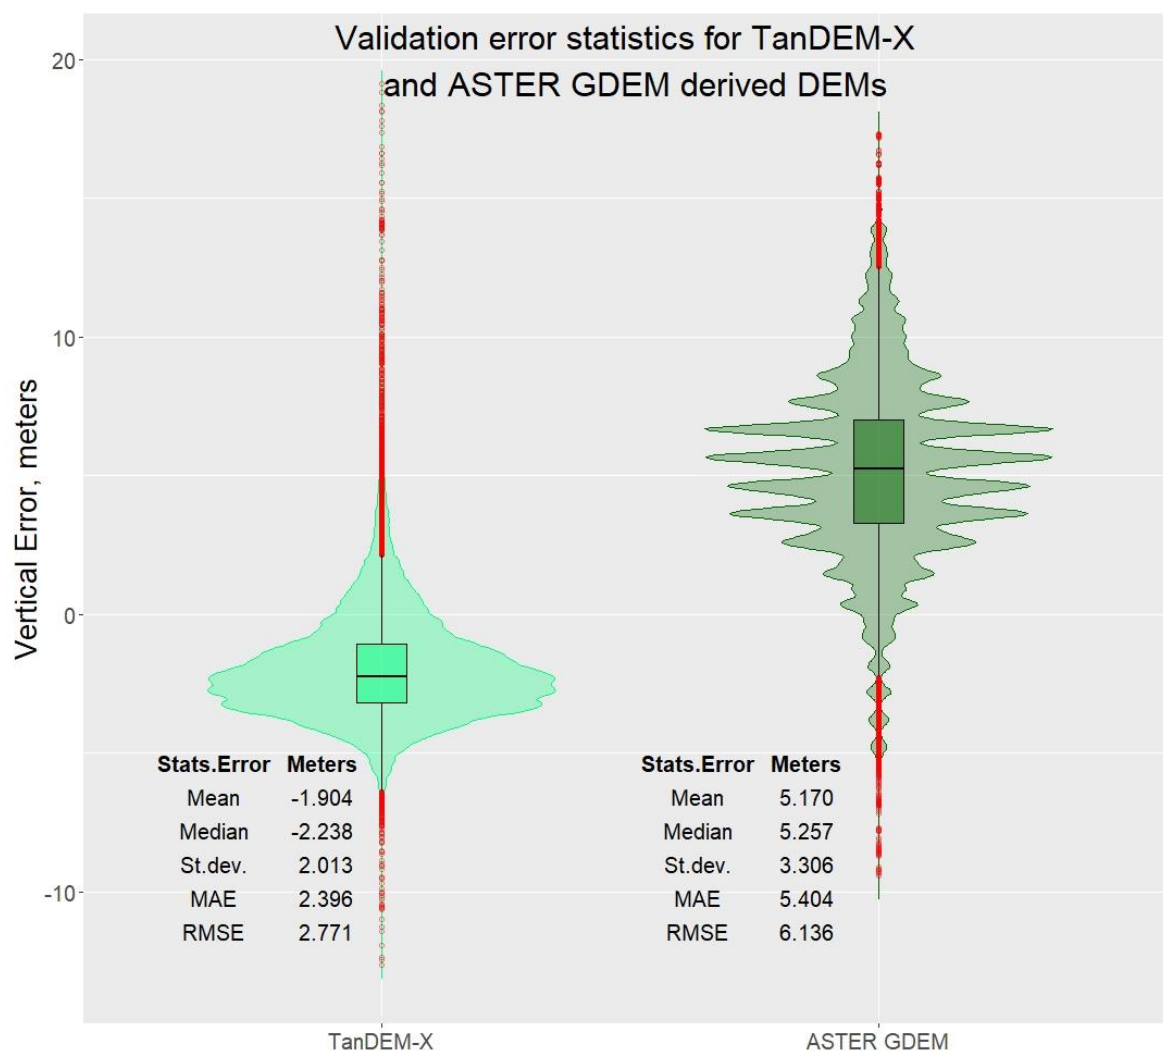

**Figure S3.** Accuracy information for the TanDEM-X and ASTER GDEM DEMs presented as violin plots. A violin plot is a type of box plot that shows the full distribution of the data in addition to summary statistics and interquartile range. MAE is mean absolute error. RMSE is root mean square error.

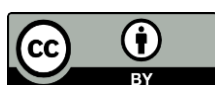

© 2020 by the authors. Submitted for possible open access publication under the terms and conditions of the Creative Commons Attribution (CC BY) license (<http://creativecommons.org/licenses/by/4.0/>).
